# Supplementary material for: Neonatal diabetes caused by a homozygous KCNJ11 mutation demonstrates that tiny changes in ATP sensitivity markedly affect diabetes risk
Source: Springer Nature journal article supplement (doi:10.1007/s00125-016-3964-x), 2016-04-27
Supplement: MOESM1 [file 10057056]

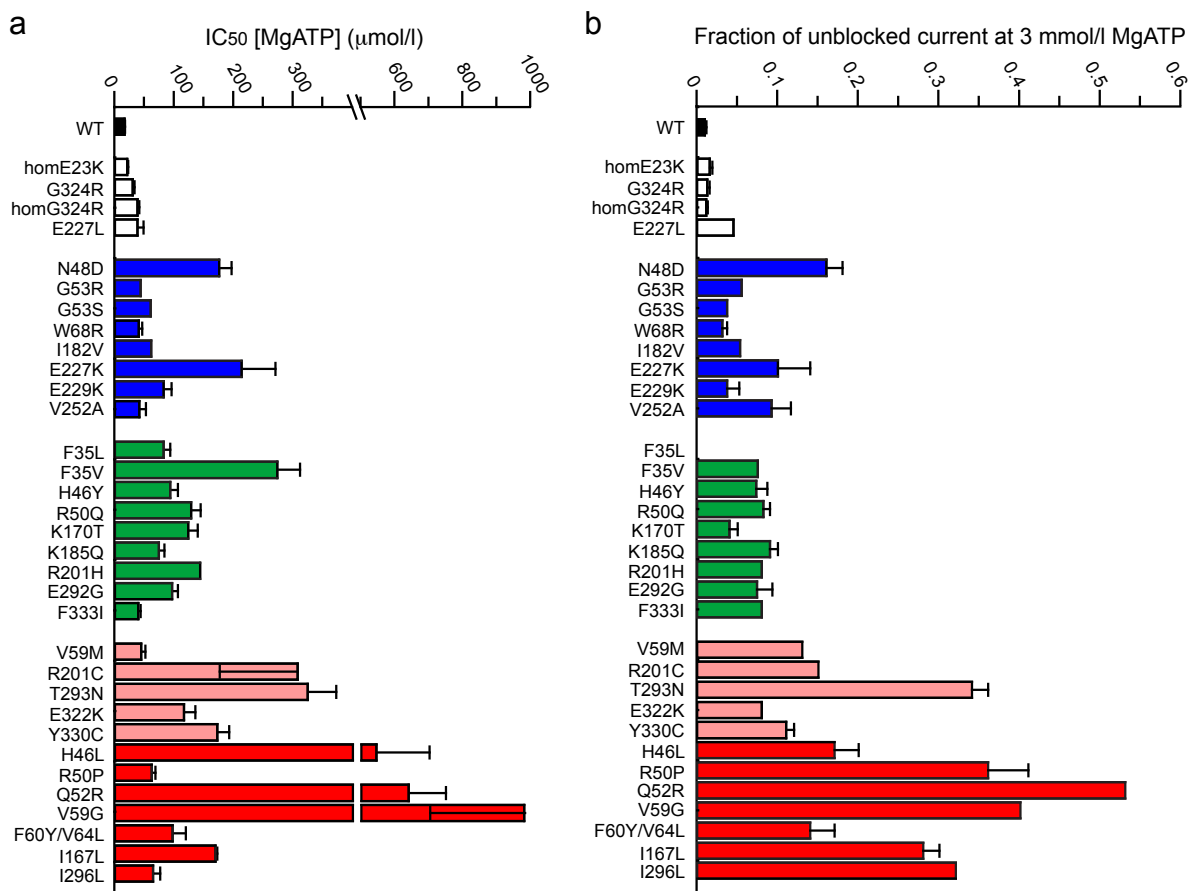

**ESM Fig. 1** Comparison of ATP sensitivities. **(a)** IC<sub>50</sub> for MgATP inhibition, and **(b)** the fraction of unblocked current at 3 mmol/l MgATP for WT and the indicated Kir6.2 mutant channels. Homomeric channels (E23K, G324R) are indicated by ‘hom’; all other data are from pseudo-heterozygous K<sub>ATP</sub> channels. White bars, mutations causing/predisposing to diabetes in later life (see text); blue bars, TNDM; green bars, PNDM; pink bars, iDEND syndrome; red bars, DEND syndrome. Data for mutations other than G324R and E23K are taken from previous studies (see below [1-16]). Note the IC<sub>50</sub> values for some DEND mutations (a) do not adequately reflect the mutation/disease severity, as these channels exhibit a large pedestal of unblocked current at physiological ATP levels (as seen in b). Data are mean±SEM.

## References

1. D'Amato E, Tamaro P, Craig TJ, et al (2008) Variable phenotypic spectrum of diabetes

- mellitus in a family carrying a novel *KCNJ11* gene mutation. *Diabet Med* 25:651-656
2. Gloyn AL, Reimann F, Girard C, et al (2005) Relapsing diabetes can result from moderately activating mutations in *KCNJ11*. *Hum Mol Genet* 14:925-934
  3. Girard CA, Shimomura K, Proks P, et al (2006) Functional analysis of six Kir6.2 (*KCNJ11*) mutations causing neonatal diabetes. *Pflugers Arch* 453:323-332
  4. Mlynarski W, Tarasov AI, Gach A, et al (2007) Sulfonylurea improves CNS function in a case of intermediate DEND syndrome caused by a mutation in *KCNJ11*. *Nat Clin Pract Neurol* 3:640-645
  5. Männikkö R, Jefferies C, Flanagan SE, et al (2010) Interaction between mutations in the slide helix of Kir6.2 associated with neonatal diabetes and neurological symptoms. *Hum Mol Genet* 19:963-972
  6. Männikkö R, Stansfeld PJ, Ashcroft AS, et al (2011) A conserved tryptophan at the membrane-water interface acts as a gatekeeper for Kir6.2/SUR1 channels and causes neonatal diabetes when mutated. *J Physiol* 589:3071-3083
  7. Proks P, Girard C, Ashcroft FM (2005) Functional effects of *KCNJ11* mutations causing neonatal diabetes: enhanced activation by MgATP. *Hum Mol Genet* 14:2717-2726
  8. Proks P, Girard C, Haider S, et al (2005) A gating mutation at the internal mouth of the Kir6.2 pore is associated with DEND syndrome. *EMBO Rep* 6:470-475
  9. Proks P, Girard C, Baevre H, et al (2006) Functional effects of mutations at F35 in the NH<sub>2</sub>-terminus of Kir6.2 (*KCNJ11*), causing neonatal diabetes, and response to sulfonylurea therapy. *Diabetes* 55:1731-1737
  10. Shimomura K, Girard CA, Proks P, et al (2006) Mutations at the same residue (R50) of Kir6.2 (*KCNJ11*) that cause neonatal diabetes produce different functional effects. *Diabetes* 55:1705-1712
  11. Shimomura K, Hörster F, de Wet H, et al (2007) A novel mutation causing DEND syndrome: a treatable channelopathy of pancreas and brain. *Neurology* 69:1342-1349
  12. Shimomura K, Flanagan SE, Zadek B, et al (2009) Adjacent mutations in the gating loop of Kir6.2 produce neonatal diabetes and hyperinsulinism. *EMBO Mol Med* 1:166-177
  13. Shimomura K, de Nancrales GP, Foutinou C, et al (2010) The first clinical case of a mutation at residue K185 of Kir6.2 (*KCNJ11*): a major ATP-binding residue. *Diabet Med* 27:225-229
  14. Tammaro P, Girard C, Molnes J, et al (2005) Kir6.2 mutations causing neonatal diabetes

- provide new insights into Kir6.2-SUR1 interactions. *EMBO J* 24:2318-2330
15. Tammaro P, Proks P, Ashcroft FM (2006) Functional effects of naturally occurring *KCNJ11* mutations causing neonatal diabetes on cloned cardiac  $K_{ATP}$  channels. *J Physiol* 571:3-14
  16. Tarasov AI, Girard CA, Larkin B, et al (2007) Functional analysis of two Kir6.2 (*KCNJ11*) mutations, K170T and E322K, causing neonatal diabetes. *Diabetes Obes Metab* 9:46-55
